# Supplementary material
Source: PubMed Central journal article supplement (PMC4028363)

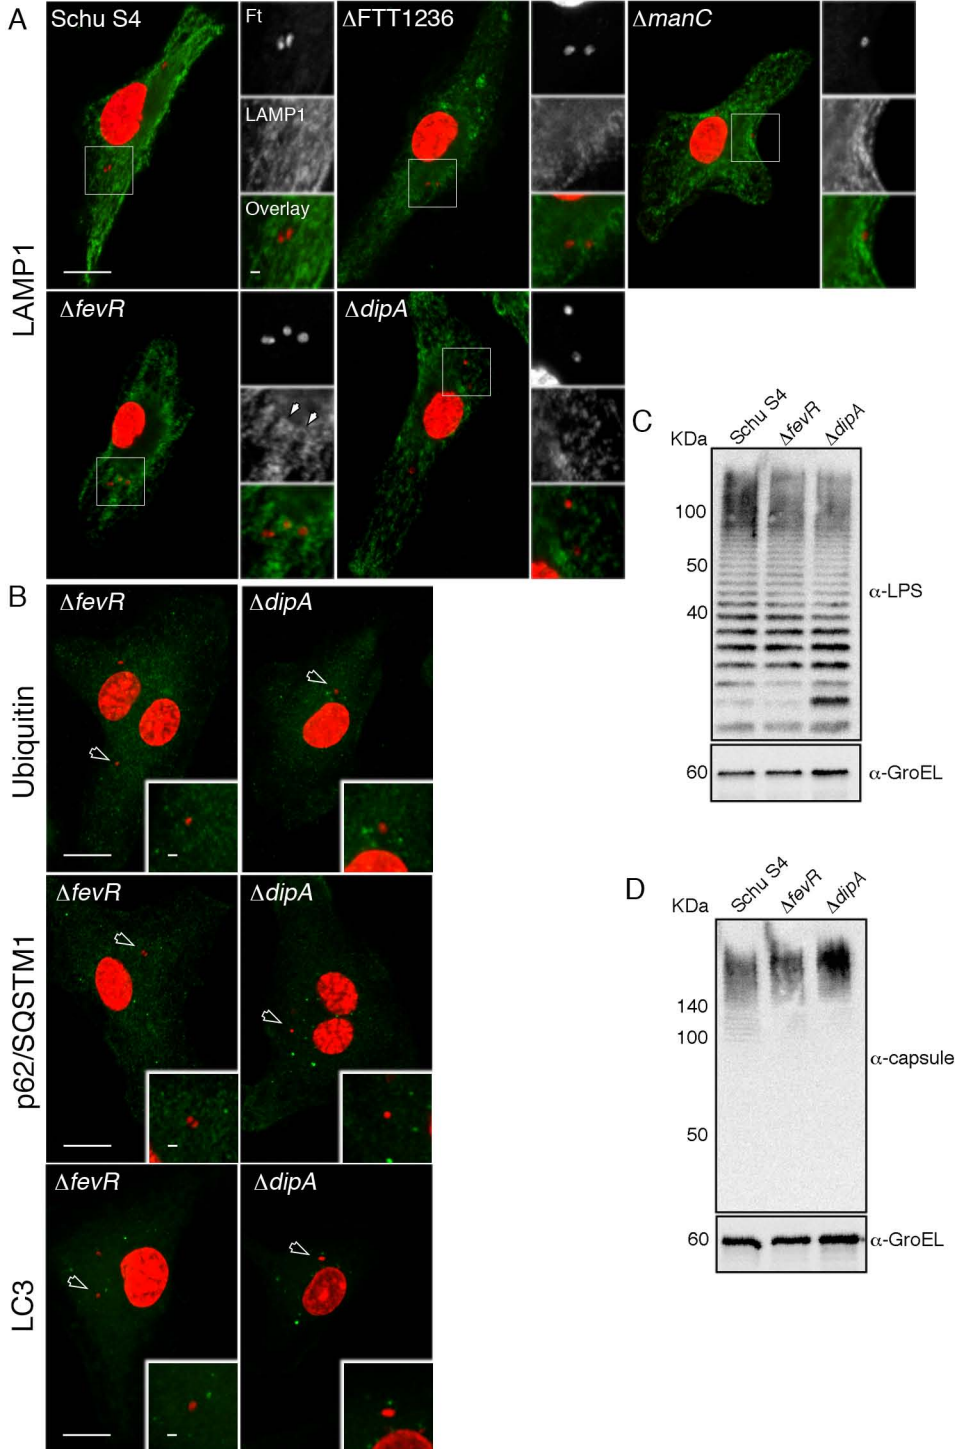

Fig. S1

Schu S4

$\Delta$ FTT1236

$\Delta$ manC

$\Delta$ fevR

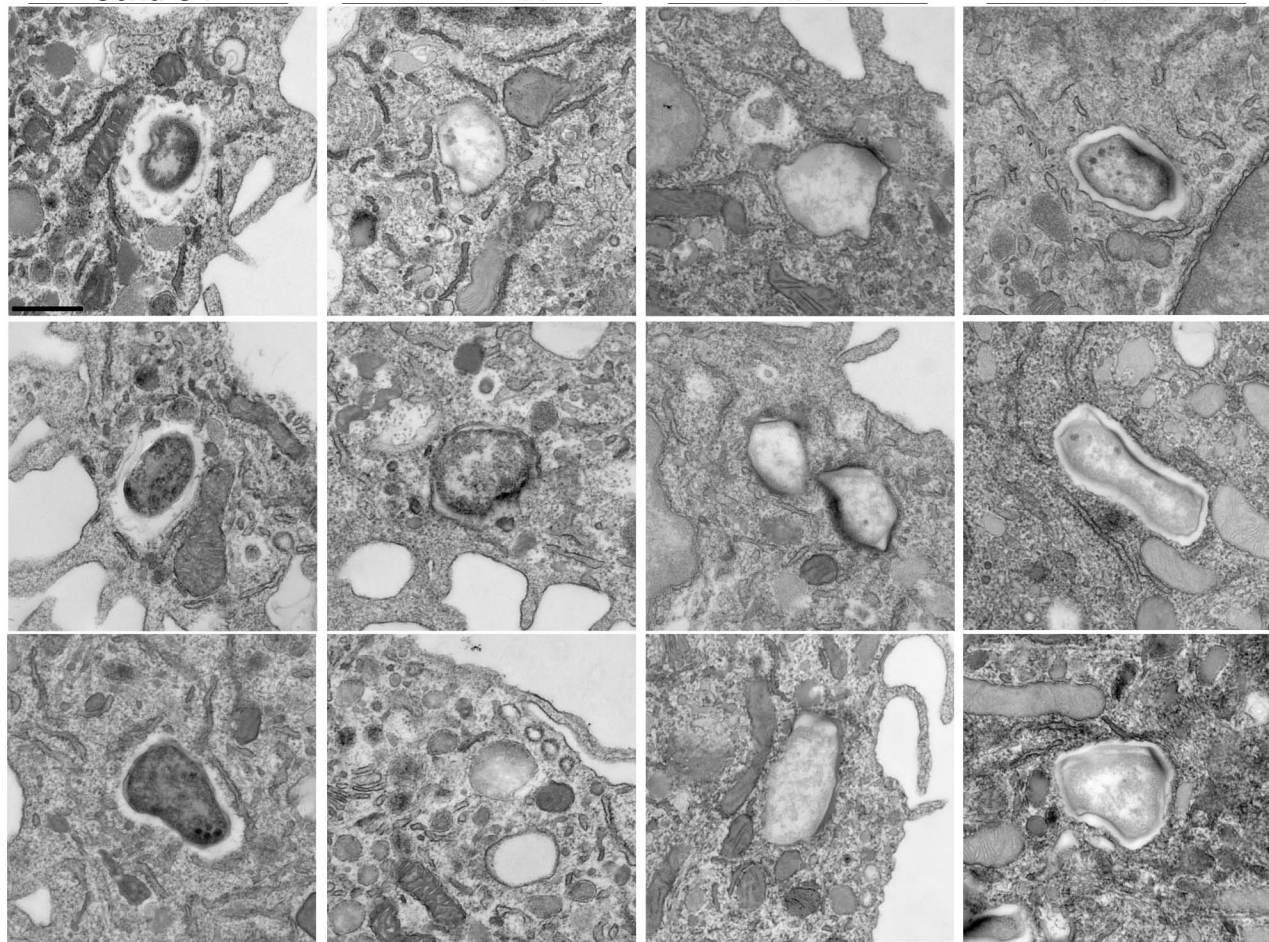

Fig S2

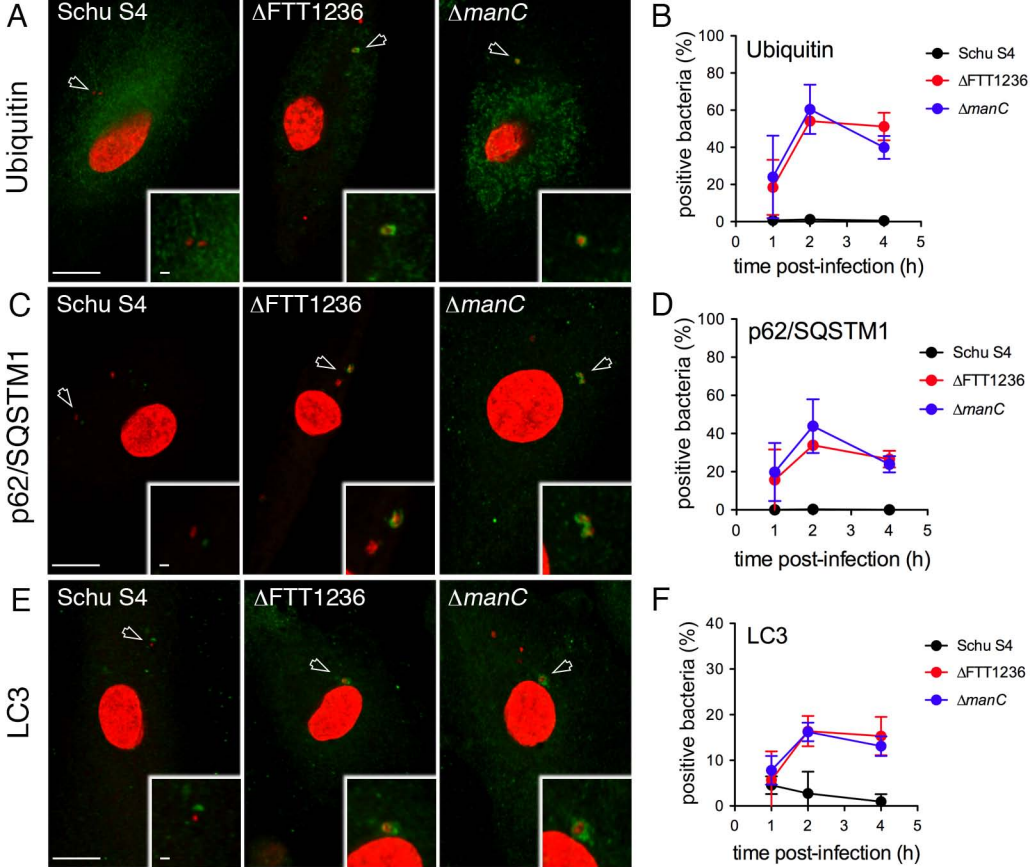

Fig. S3

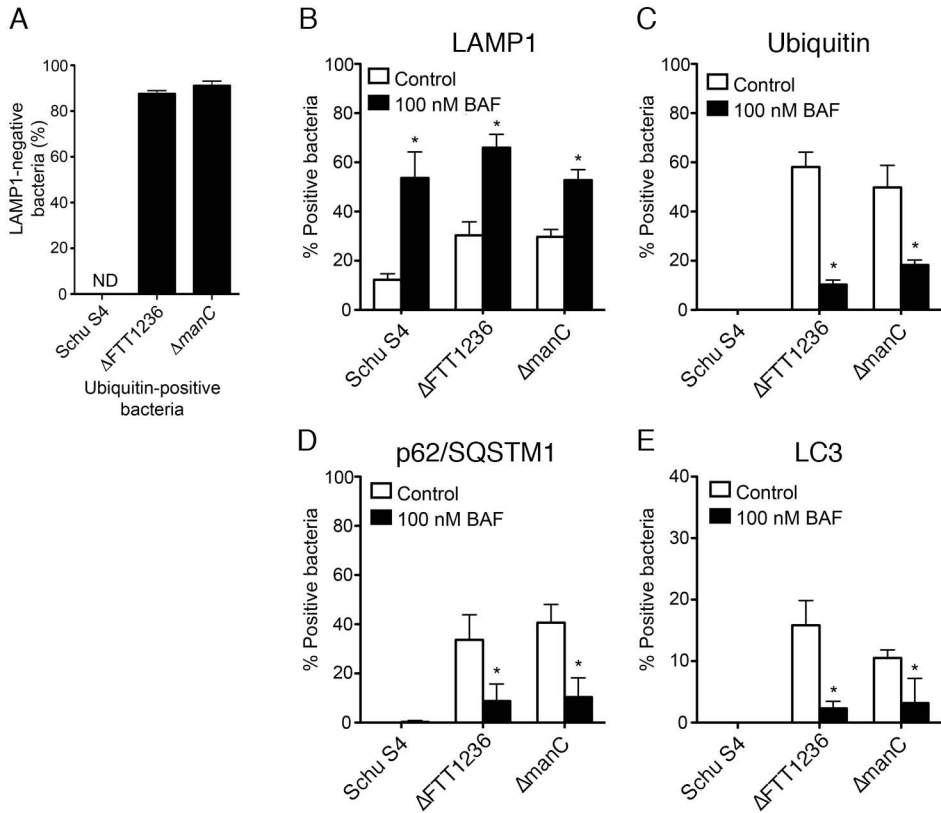

Fig. S4

A

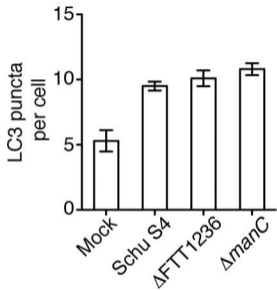

B

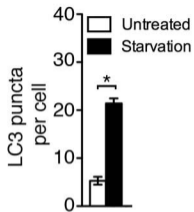

C

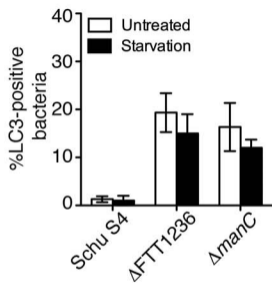

Fig S5

Supplement: NIHMS545752-supplement-Supp_Fig_S1-S5.pdf [file NIHMS545752-supplement-Supp_Fig_S1-S5.pdf]
